# Supplementary material
Source: publisher site journal article supplement (https://e-cmh.org/upload/media/cmh-2023-0121-Supplementary-3.pdf)
Supplement: Supplementary file 1 [file cmh-2023-0121-Supplementary-3.pdf]

**Appendix 3.** Dynamic change of on-treatment scores of risk prediction models

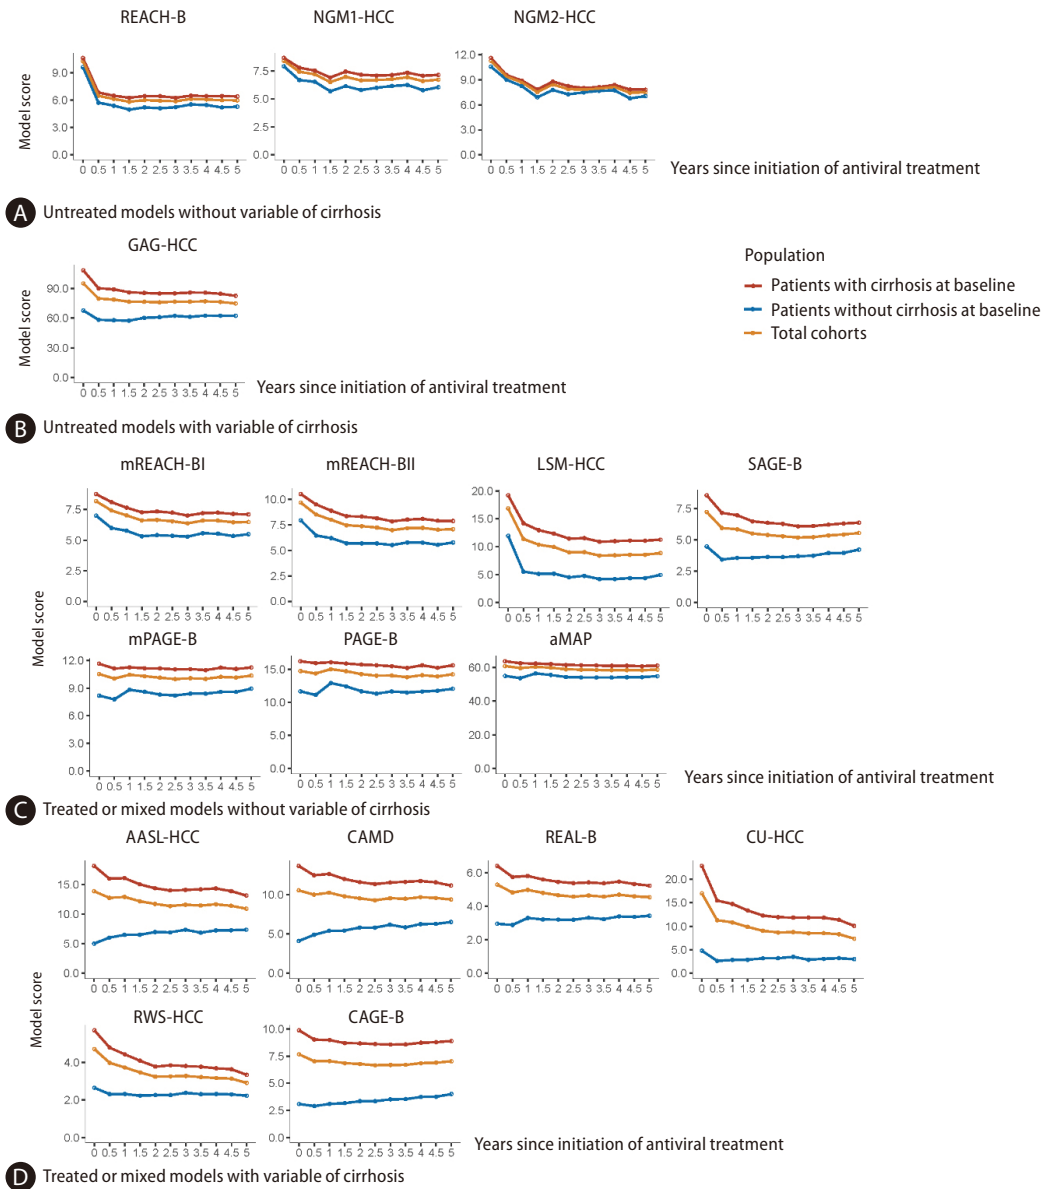

**Supplementary Figure 3-1.** Dynamic change of on-treatment scores of risk prediction models by cirrhosis status at baseline. The figure revealed most HCC risk scores decreased slowly or maintained steadily from years 2.5 to 5 in the total cohort (the yellow lines), in patients with cirrhosis at baseline (the red lines), and in patients without cirrhosis at baseline (the blue lines).

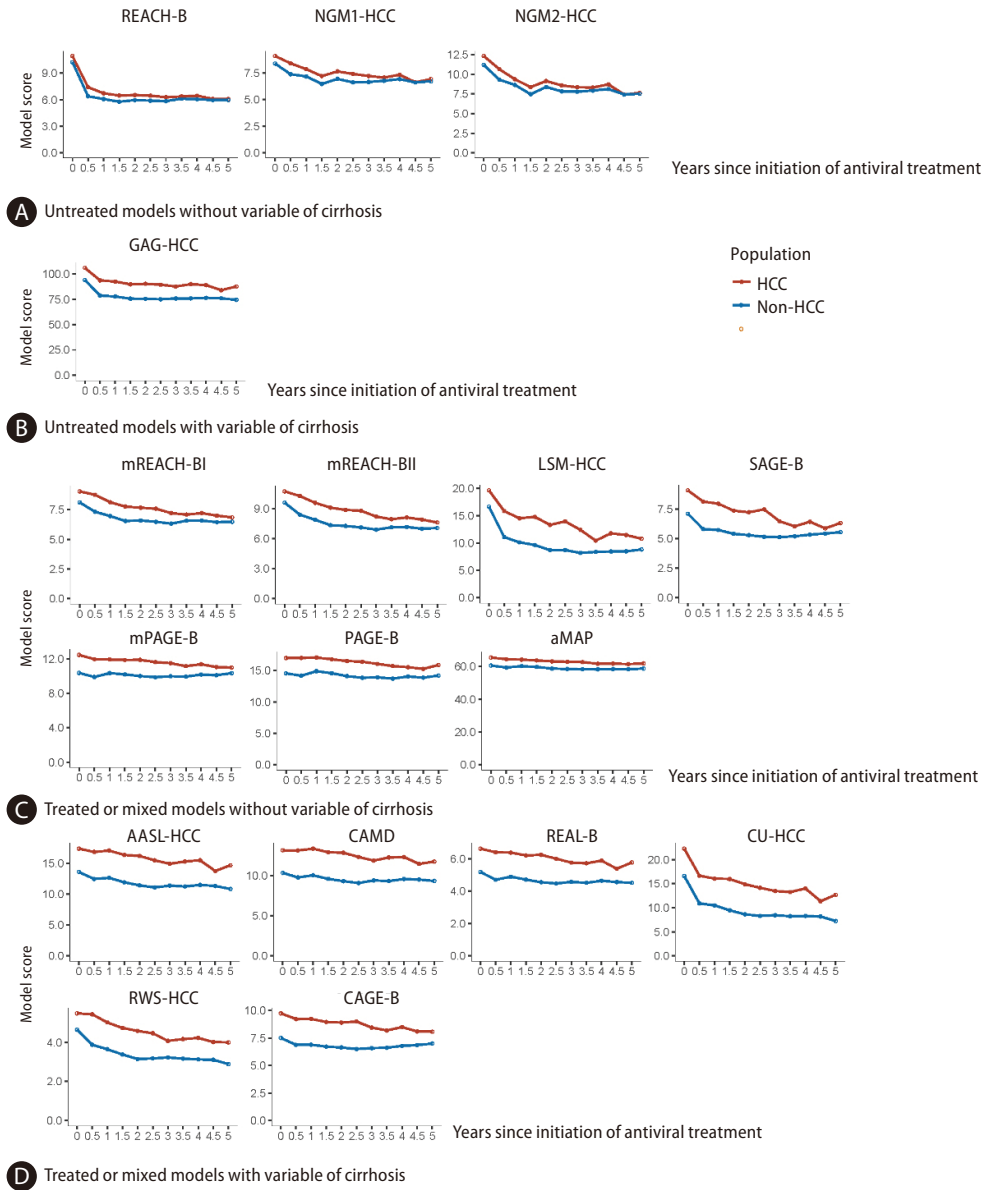

**Supplementary Figure 3-2.** Dynamic change of on-treatment scores of risk prediction models by HCC development in total cohorts. The figure revealed model scores declined with the prolongation of AVT in both patients with HCC development (the red lines) and patients without (the blue lines). The difference in the risk scores between patients with HCC development and patients without narrowed with time of AVT.

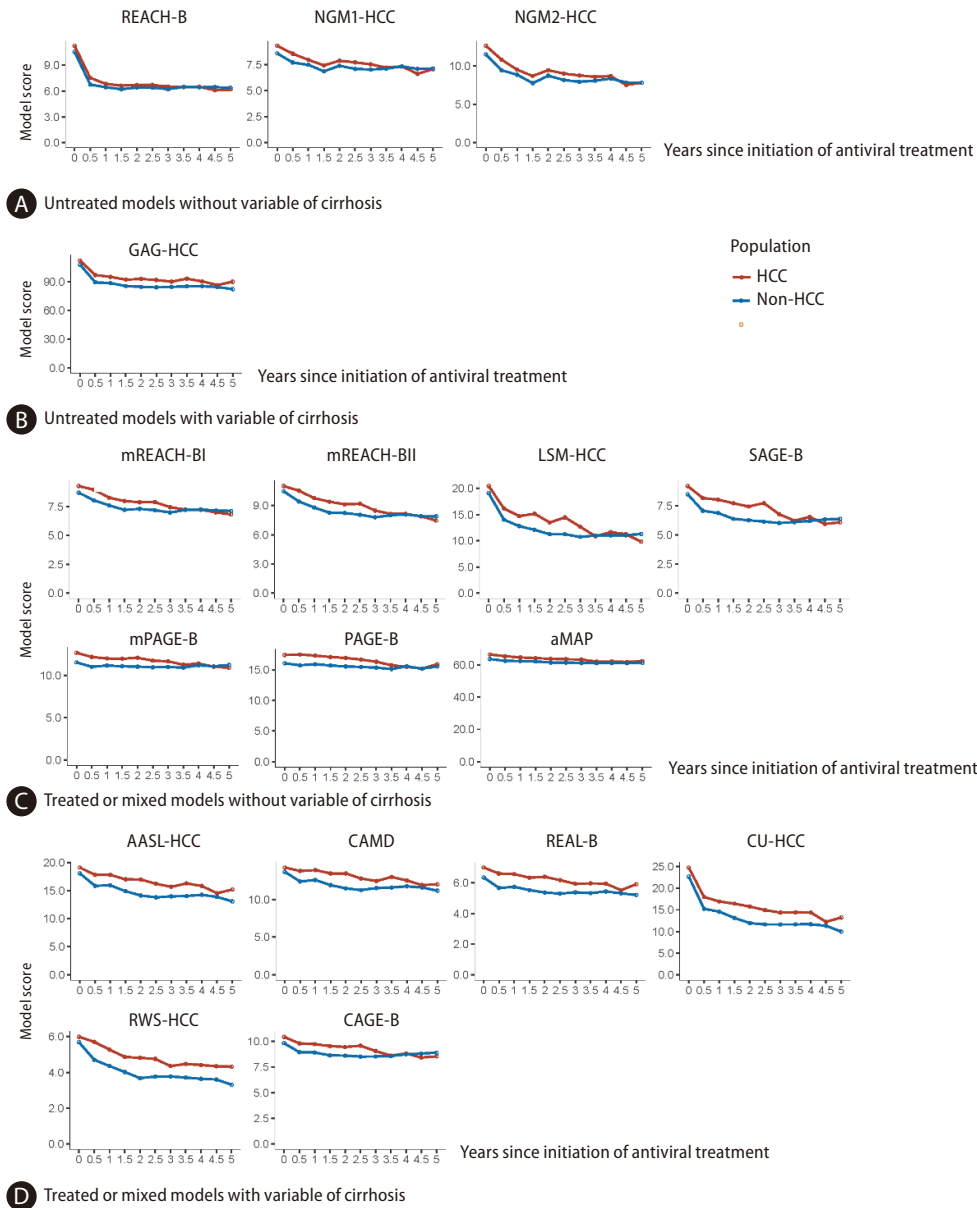

**Supplementary Figure 3-3.** Dynamic change of on-treatment scores of risk prediction models by HCC development in patients with cirrhosis at baseline. The figure revealed model scores declined with prolongation of AVT in cirrhotic patients at pretreatment, either developed HCC (the red lines) or not (the blue lines). However, the difference in the risk scores between patients with HCC development and patients without HCC development were less obvious in patients with pretreatment cirrhosis than in the total cohort (Supplementary Fig. 3-2) and further narrowed with time of AVT.
